# Supplementary material
Source: PubMed Central journal article supplement (PMC7661064)
Supplement: 20-00722.pdf [file 20-00722.pdf]

**On-line Table: Patient characteristics**

| Patient                                          | Sex | Age | Comorbidities                                             | Neurologic Symptoms                                                                    | Neuroimaging Findings                                                      | Location                                                               | Imaging             | Follow-Up Imaging | Complications                                       | Outcome                                                                         |
|--------------------------------------------------|-----|-----|-----------------------------------------------------------|----------------------------------------------------------------------------------------|----------------------------------------------------------------------------|------------------------------------------------------------------------|---------------------|-------------------|-----------------------------------------------------|---------------------------------------------------------------------------------|
| Posterior circulation ischemic/hemorrhagic event |     |     |                                                           |                                                                                        |                                                                            |                                                                        |                     |                   |                                                     |                                                                                 |
| 1                                                | F   | 57  | Aortic valve replacement                                  | Psychomotor retardation, left gaze deviation, right superior and inferior limb paresis | Ischemic changes, left PCA occlusion                                       | Bilateral occipital lobe and left cerebellum                           | CT, CTA, MR imaging | CT                | Hemorrhagic evolution, spleen and kidney infarction | Clinical improvement, residual left lower limb paresis, discharged              |
| 2                                                | M   | 78  | Diabetes, hypertension                                    | Confusion, aphasia                                                                     | Ischemic changes, distal left PCA occlusion                                | Left thalamus, left temporal-occipital lobes                           | CT, CTA             | CT                | DVT                                                 | Clinical improvement, no motor deficit, discharged                              |
| 3                                                | M   | 88  | AF, prior stroke, splenectomy, bowel carcinoma            | Left inferior limb paresis and aphasia                                                 | Ischemic changes                                                           | Right mesial temporal and occipital lobes                              | CT                  | CT                | Hemorrhagic evolution                               | Poor clinical recovery, discharged                                              |
| 4                                                | F   | 73  | Epilepsy (cryptogenetic) CKD, COPD, AF                    | Left central facial palsy, and bilateral upper limb leveling                           | Ischemic changes                                                           | Right thalamus                                                         | CT                  | CT                | None                                                | Clinical improvement, currently hospitalized                                    |
| 5                                                | M   | 58  | None                                                      | Coma                                                                                   | Ischemic changes                                                           | Right thalamus and occipital lobe                                      | CT                  | NA                | None                                                | Death                                                                           |
| 6                                                | F   | 64  | Hypertension, AF                                          | Drowsiness, reduction in visual acuity                                                 | Vasogenic edema and occipital hemorrhages (PRES), negative findings on CTA | Bilateral, posterior, frontal, parietal, temporal, and occipital lobes | CT, CTA, MR imaging | CT                | None                                                | Clinical improvement, currently hospitalized                                    |
| 7                                                | F   | 84  | Hypertension, diabetes, dyslipidemia, ovary carcinoma, TB | Aphasia, left hemiparesis                                                              | Hemorrhage, negative findings on CTA                                       | Right parieto-occipital lobe                                           | CT, CTA, MR imaging | CT                | None                                                | Clinical improvement, partial motor recovery, resolution of aphasia, discharged |

*Continued on next page*
